# Supplementary material for: Towards a Circular Economy: Study of the Mechanical, Thermal, and Electrical Properties of Recycled Polypropylene and Their Composite Materials
Source: MDPI journal article supplement (doi:10.3390/polym14245482), 2022-12-14
Supplement: s1 [file s1]

Supplementary Materials for

# Towards a Circular Economy: Study of the Mechanical, Thermal, and Electrical Properties of Recycled Polypropylene and Their Composite Materials

Tongsai Jamnongkan <sup>1\*</sup>, Nitchanan Intraramongkol <sup>1</sup>, Wesarach Samoechip <sup>2</sup>, Pranut Potiyaraj <sup>2</sup>, Rattanaphol Mongkholrattanasit <sup>3</sup>, Porntip Jamnongkan <sup>4</sup>, Piyada Wongwachirakorn <sup>5</sup>, Masataka Sugimoto <sup>6</sup>, Hiroshi Ito <sup>6</sup> and Chih-Feng Huang <sup>7,\*</sup>

<sup>1</sup> Department of Fundamental Science and Physical Education, Faculty of Science at Sriracha, Kasetsart University, Chonburi 20230, Thailand

<sup>2</sup> Department of Materials Science, Faculty of Science, Chulalongkorn University, 10330 Bangkok, Thailand

<sup>3</sup> Faculty of Industrial Textiles and Fashion Design, Rajamangala University of Technology Phra Nakhon, Bangkok 10110, Thailand

<sup>4</sup> Department of Public Health and Environment, Saensuk Municipality, Chonburi 20130, Thailand

<sup>5</sup> Department of Environmental Science, Faculty of Science and Technology, Pibulsongkarm Rajabhat University, Phitsanulok 65000, Thailand

<sup>6</sup> Graduated School of Organic Materials Science, Faculty of Engineering, Yamagata University, Yonezawa 980-8565, Yamagata, Japan

<sup>7</sup> Department of Chemical Engineering, i-Center for Advanced Science and Technology (iCAST), National Chung Hsing University, Taichung 40227, Taiwan

\* Correspondence: jamnongkan.t@ku.ac.th (T.J.); huangcf@dragon.nchu.edu.tw (C.-F.H.)

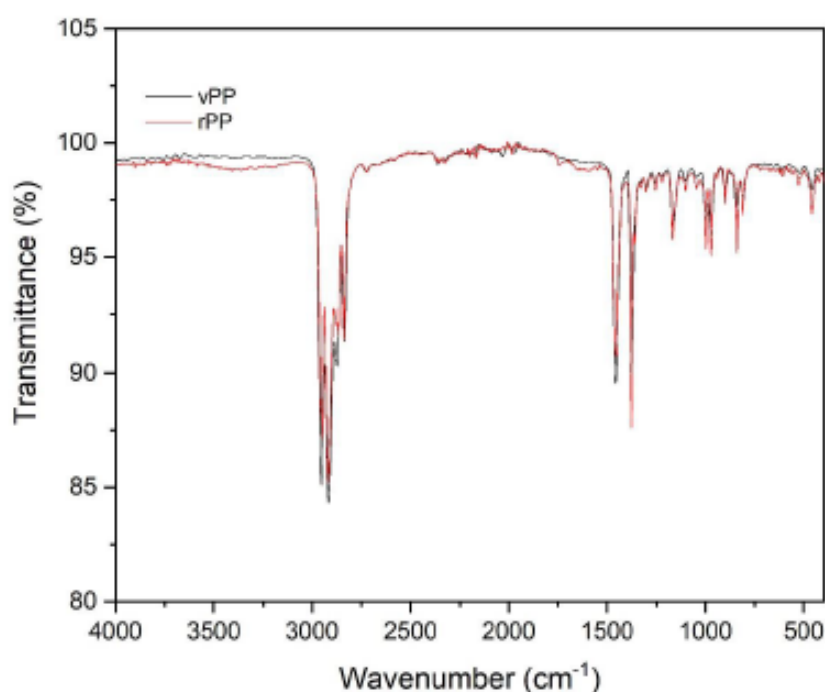

**Figure S1.** FTIR spectra of vPP and rPP.
